# Supplementary material for: CARD9 in neutrophils protects from colitis and controls mitochondrial metabolism and cell survival
Source: HighWire-hosted journal article supplement (doi:10.1136/gutjnl-2022-326917), 2022-09-27
Supplement: gutjnl-2022-326917supp009_data_supplement.pdf [file gutjnl-2022-326917supp009_data_supplement.pdf]

**Table S3. Characteristics of IBD patients**

|                        | <b>Control IBD patients</b> | <b>CARD9 IBD patients</b> | <b>Healthy subjects</b> |
|------------------------|-----------------------------|---------------------------|-------------------------|
| <i>Number</i>          | 11                          | 8                         | 6                       |
| <i>Age (years)</i>     | 40.5 ±8                     | 48 ±7.6                   | 33.7 ±5.9               |
| <i>% Male</i>          | 5 (55.5%)                   | 4 (50%)                   | 2 (33.3%)               |
| <i>Treatment</i>       |                             |                           |                         |
| oral-5-ASA (%)         | 4 (36%)                     | 2 (25%)                   | 0                       |
| anti-TNF (%)           | 10 (90%)                    | 7 (87.5%)                 | 0                       |
| anti-integrin α4β7 (%) | 1 (10%)                     | 1 (12.5%)                 | 0                       |
| methotrexate (%)       | 2 (18%)                     | 1 (12.5%)                 | 0                       |

Cohort characteristics in terms of age, sex and treatment. Numeric data are summarized as mean ± s.d.

Sampling and analysis performed between 01/2022 and 04/2022.
