# Supplementary figures and images for: CARD9 in neutrophils protects from colitis and controls mitochondrial metabolism and cell survival
Source: HighWire-hosted journal article supplement (doi:10.1136/gutjnl-2022-326917), 2022-09-27

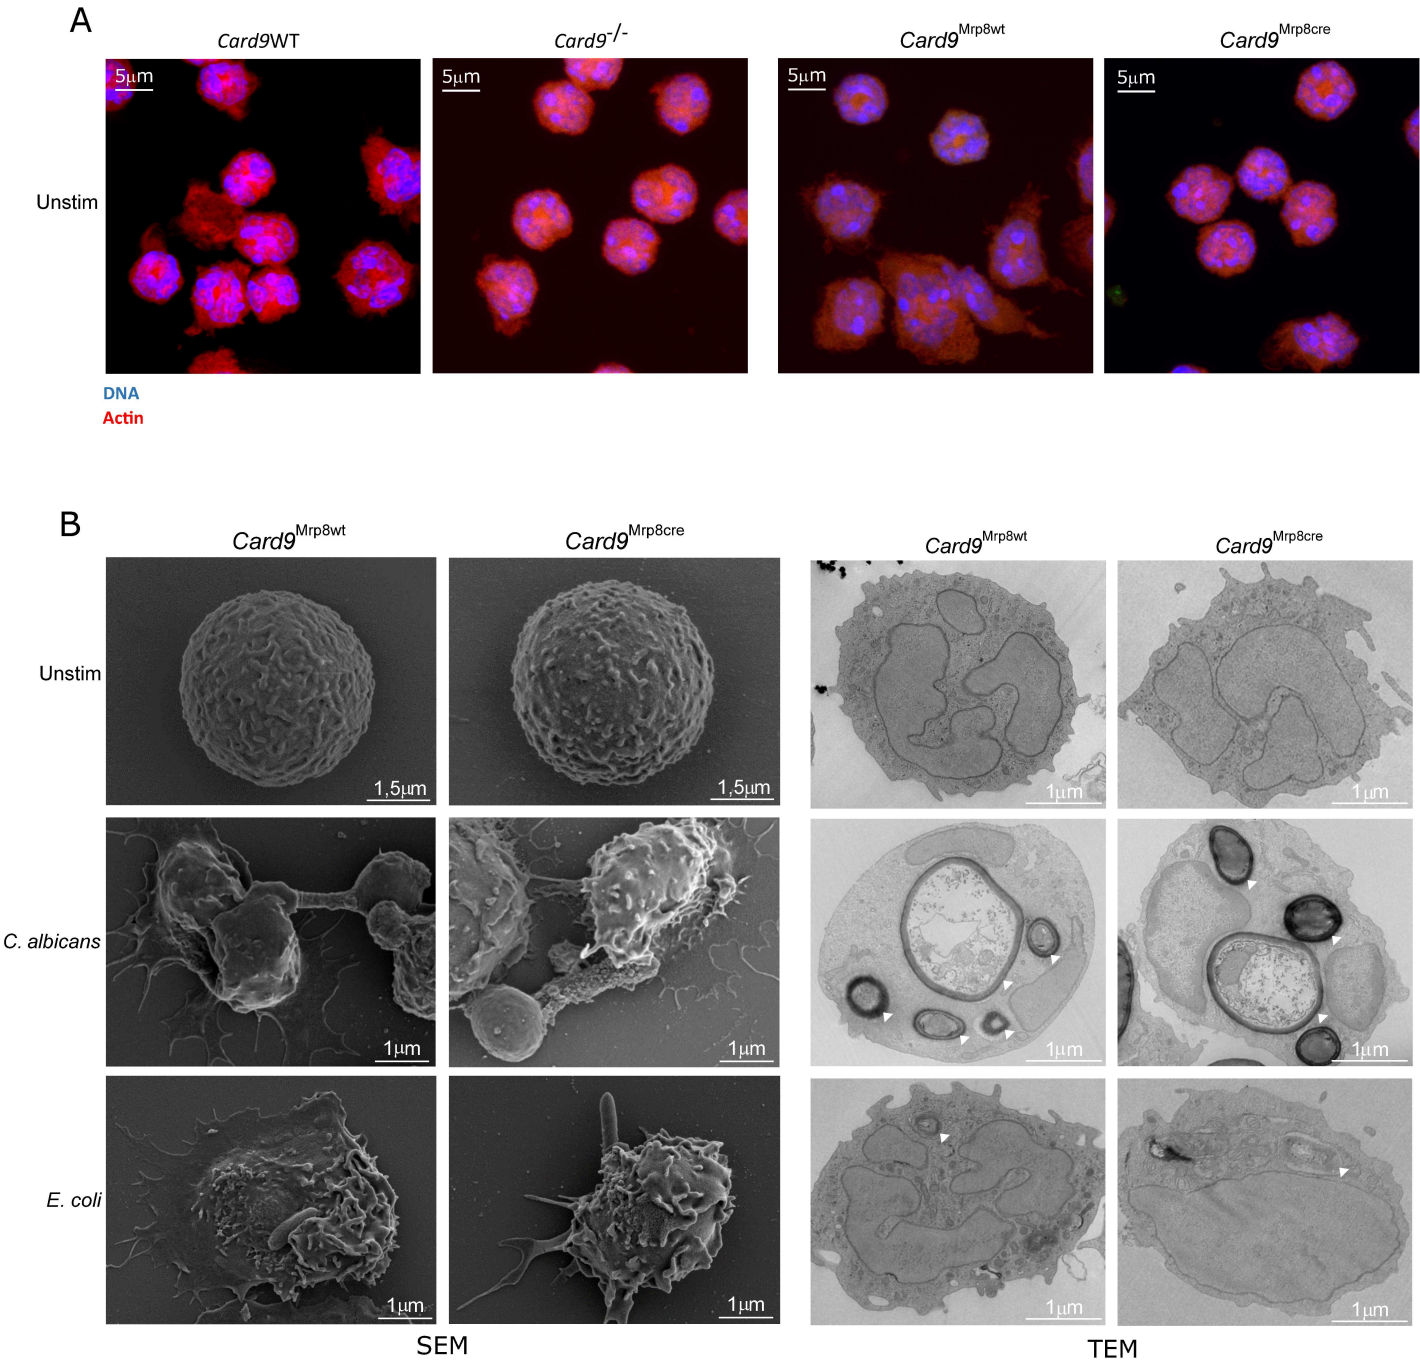

Supplement: gutjnl-2022-326917supp003_data_supplement.pdf [file gutjnl-2022-326917supp003_data_supplement.pdf]

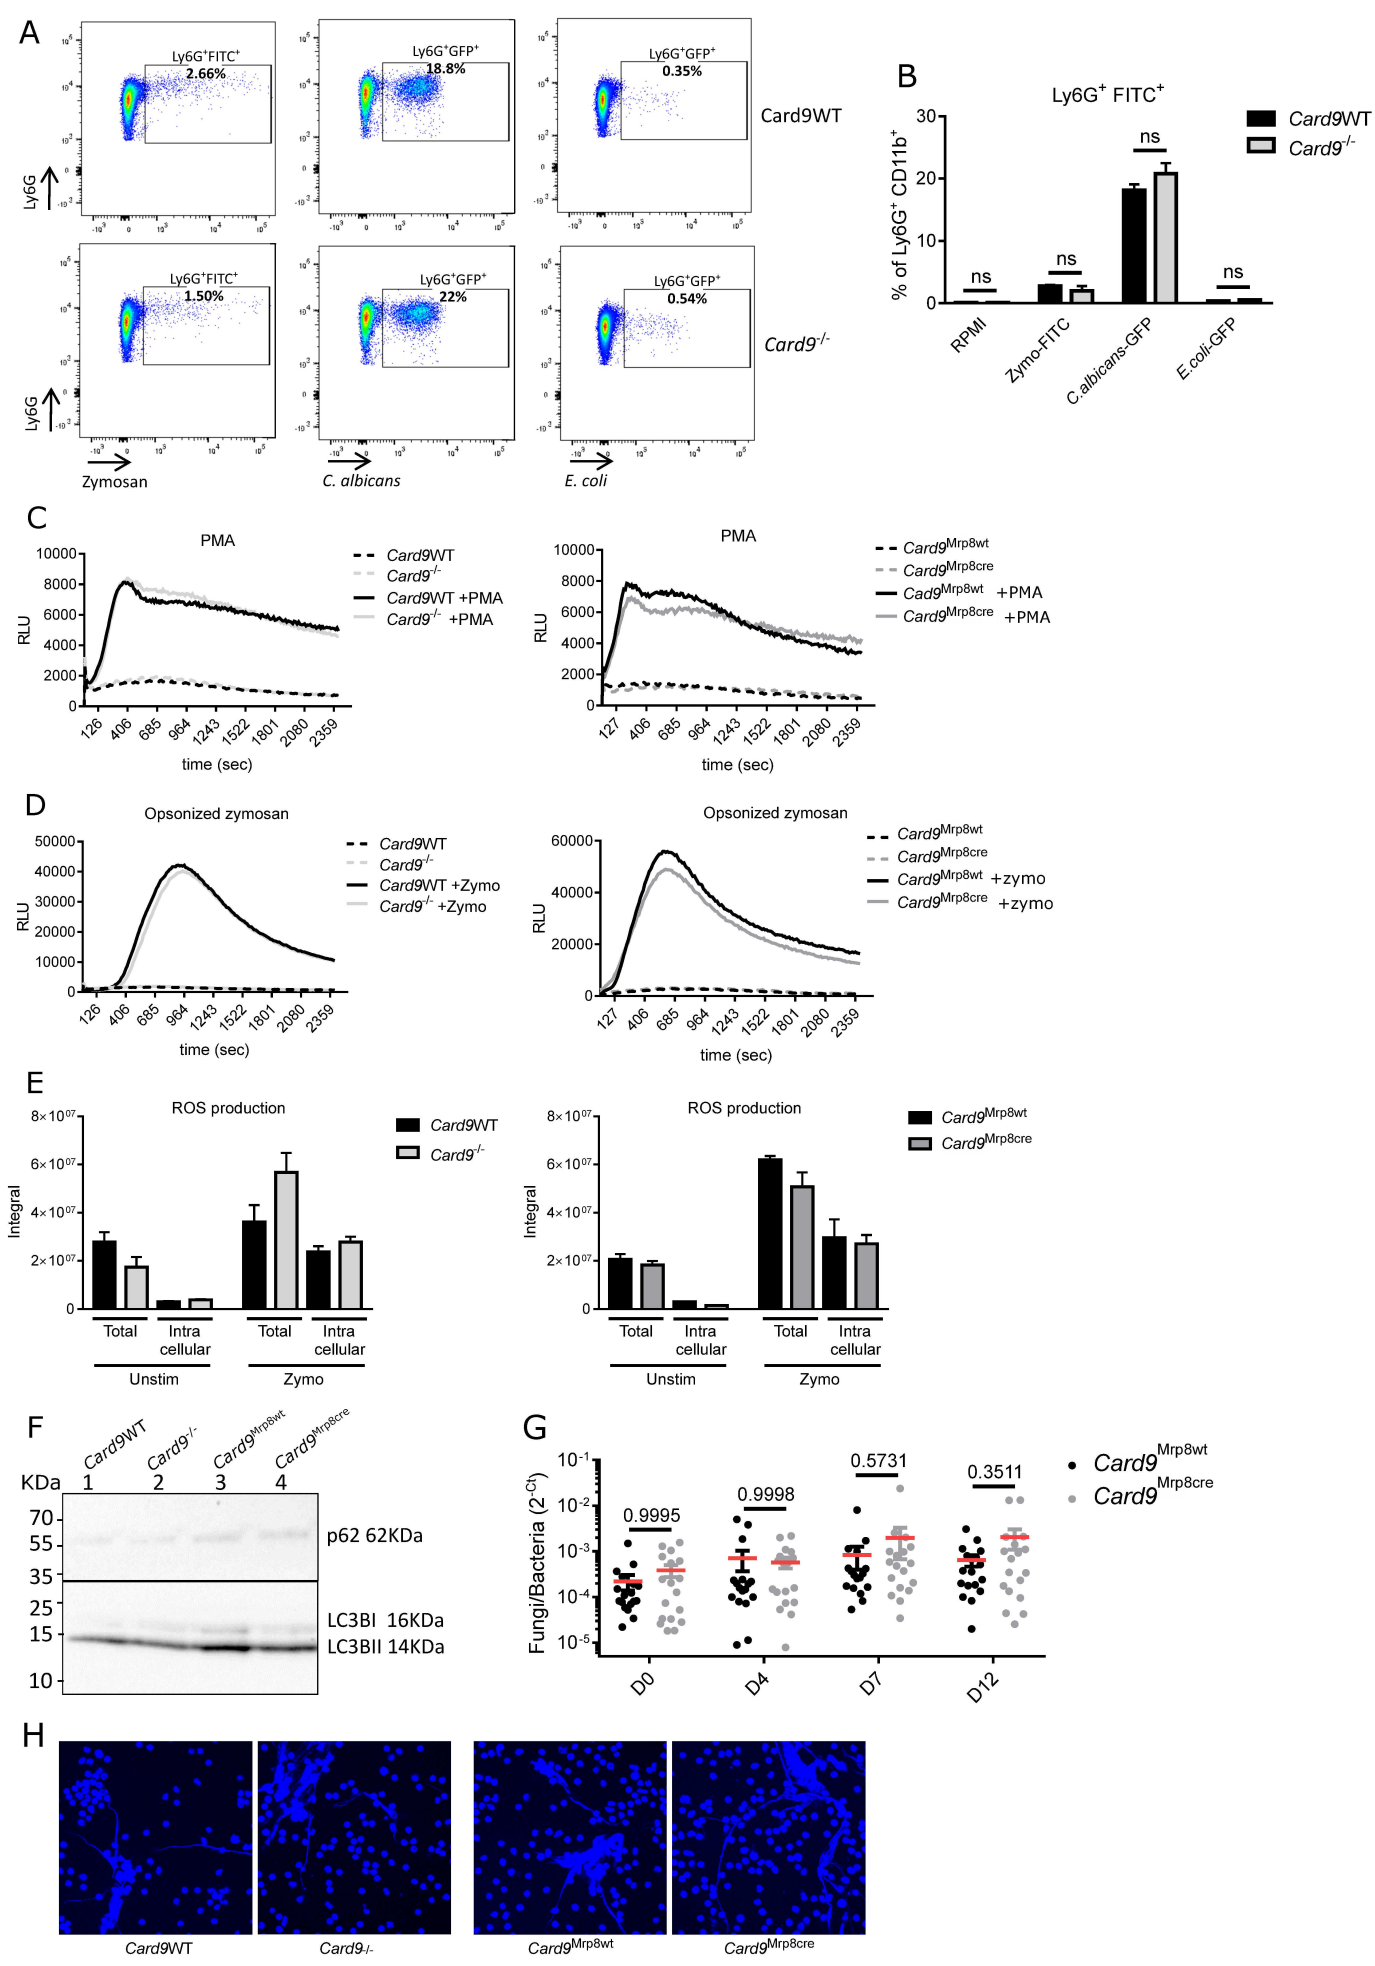

Supplement: gutjnl-2022-326917supp004_data_supplement.pdf [file gutjnl-2022-326917supp004_data_supplement.pdf]

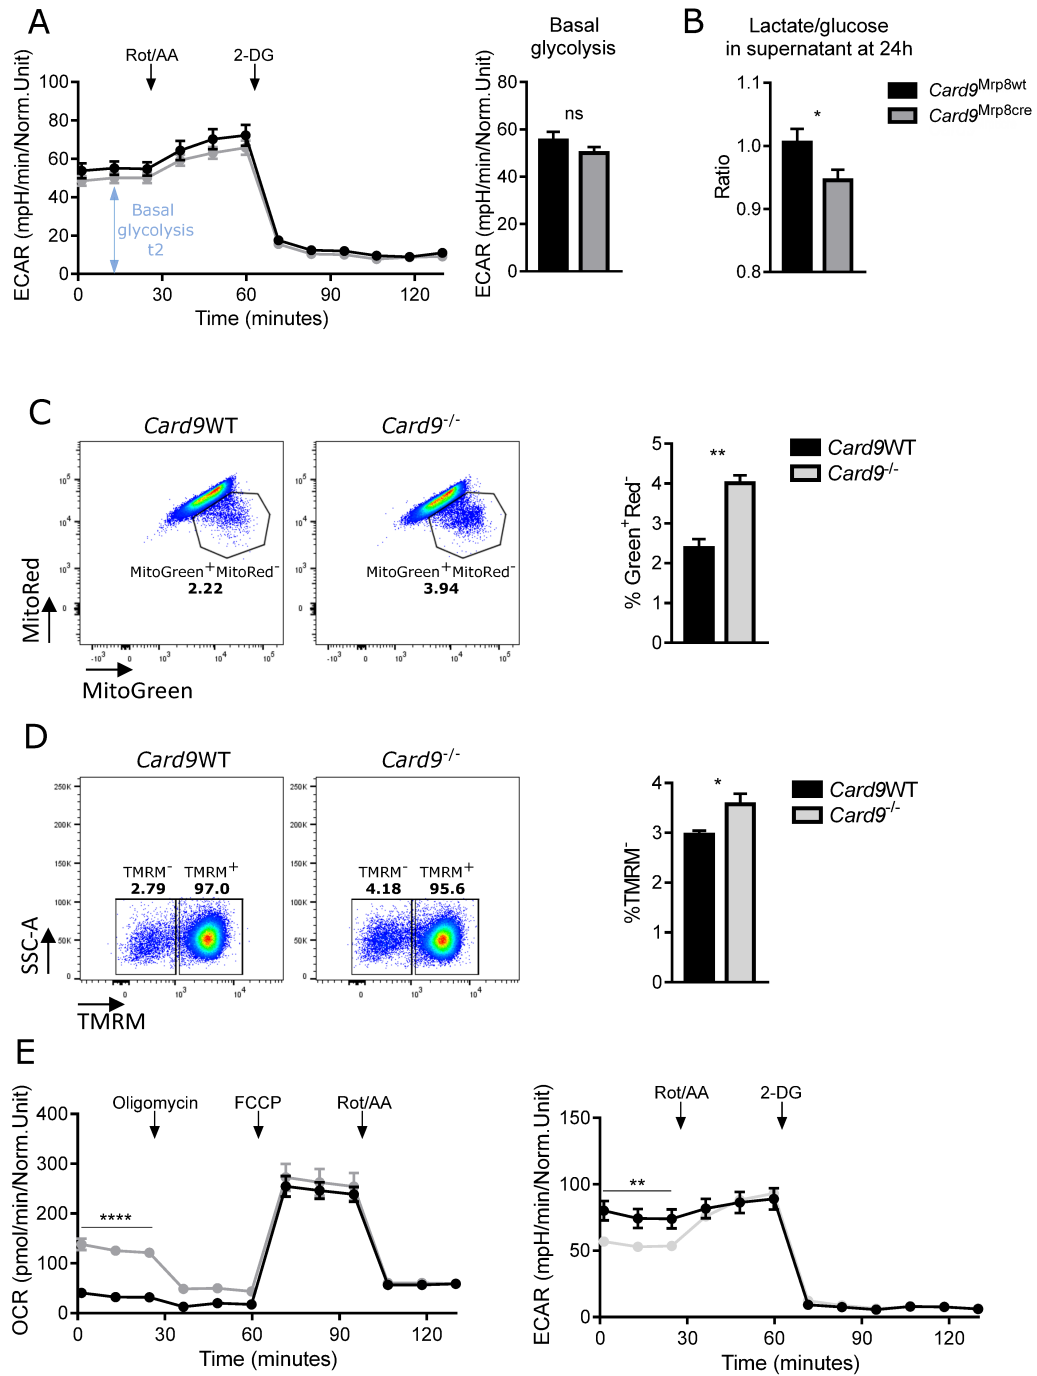

Supplement: gutjnl-2022-326917supp006_data_supplement.pdf [file gutjnl-2022-326917supp006_data_supplement.pdf]
